# Supplementary material
Source: PubMed Central journal article supplement (PMC4408231)
Supplement: NIHMS666161-supplement-1.pdf [file NIHMS666161-supplement-1.pdf]

| Gene Symbol | Average signal intensity (log2) |          |
|-------------|---------------------------------|----------|
|             | F.Paic et al.                   | Our data |
| 18S         | 13.88                           | 13.62    |
| Runx2       | 6.11                            | 11.39    |
| Sp7         | 13.39                           | 11.27    |
| Col1a1      | 15.29                           | 13.25    |
| Bglap1      | 14.66                           | 12.22    |
| Spp1        | 14.52                           | 13.16    |
| Tnfrsf11b   | 7.81                            | 8.53     |
| Tnfrsf11a   | 6.52                            | 7.45     |
| Tnfsf11     | 7.37                            | 8.74     |
| Dkk1        | 7.26                            | 10.59    |
| Sost        | 5.14                            | 7.66     |
| Dmp1        | 6.26                            | 12.50    |
| Calcr       | 5.28                            | 5.58     |

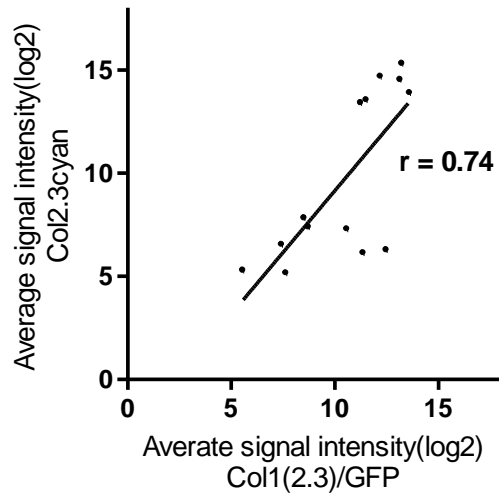

**Supplemental Figure1.** Correlation in the average intensity values between our data and Paic et al.'s data
